# Supplementary material for: Service Users’ Priorities and Preferences for Treatment of Psychosis: A User-Led Delphi Study
Source: Atypon-hosted journal article supplement (doi:10.1176/appi.ps.201300289), 2014-06-16
Supplement: 1167_ds001.pdf [file 1167_ds001.pdf]

**Table 1a: Statements included in consensus regarding priorities and preferences (contd.)**

| Statement                                                      | Stage Included | Essential % | Important % | Do not know / depends % | Unimportant % | Not required % |
|----------------------------------------------------------------|----------------|-------------|-------------|-------------------------|---------------|----------------|
| <b>A: 'What I most want help with'</b>                         |                |             |             |                         |               |                |
| feeling paranoid                                               | 2              | <b>57.7</b> | 23.1        | 11.5                    | 0.0           | 7.7            |
| Stress                                                         | 2              | 55.2        | 27.6        | 10.3                    | 3.4           | 3.4            |
| anxiety or feeling nervous                                     | 2              | 48.3        | 35.4        | 10.3                    | 3.4           | 3.4            |
| feeling confused or unable to control my thoughts              | 2              | 32.1        | 53.6        | 3.6                     | 0.0           | 10.7           |
| concentration or memory problems                               | 2              | 24.1        | 58.6        | 10.3                    | 3.4           | 3.4            |
| <b>B: 'What I want for the long-term'</b>                      |                |             |             |                         |               |                |
| understand my psychological problems                           | 2              | 62.1        | 31.0        | 0.0                     | 3.4           | 3.4            |
| learn to cope with ongoing 'unusual psychological experiences' | 2              | 48.3        | 34.5        | 6.9                     | 3.4           | 6.9            |
| improve my emotional wellbeing                                 | 2              | 37.9        | 51.7        | 3.4                     | 3.4           | 3.4            |
| improve my energy and motivation                               | 2              | 27.6        | 55.2        | 10.3                    | 3.4           | 3.4            |
| feel better about myself                                       | 2              | 24.1        | 58.6        | 13.8                    | 0.0           | 3.4            |
| improve my concentration and memory                            | 2              | 20.7        | 62.1        | 3.4                     | 6.9           | 6.9            |
| remain out of hospital (for my mental health issues)           | 3              | 27.8        | 55.6        | 11.1                    | 0.0           | 5.6            |
| <b>C: 'What I would prefer when I</b>                          |                |             |             |                         |               |                |

|                                                                                               |   |      |      |      |     |     |
|-----------------------------------------------------------------------------------------------|---|------|------|------|-----|-----|
| <b>receive mental health help'</b>                                                            |   |      |      |      |     |     |
| offer help based on my individual problems (rather than help based on a clinical 'diagnosis') | 2 | 66.7 | 18.5 | 14.8 | 0.0 | 0.0 |
| inform me about different types of help available                                             | 2 | 60.7 | 32.1 | 7.1  | 0.0 | 0.0 |
| allow me to play a part in making decisions about what kind of help is best for me            | 2 | 60.7 | 28.6 | 7.1  | 3.6 | 0.0 |
| <b>D: 'What I prefer when meeting with mental health staff</b>                                | 2 |      |      |      |     |     |
| in private (between myself and staff)                                                         | 3 | 55.6 | 33.3 | 5.6  | 0.0 | 5.6 |
| offer help that's appropriate for different age-groups                                        | 2 | 40.7 | 40.7 | 11.1 | 0.0 | 7.4 |

**Table 2: Participant characteristics**

| <b>Personal characteristics</b> | <b>Stage 2, n =32</b> | <b>Stage 3, n = 21</b> |
|---------------------------------|-----------------------|------------------------|
| <b>Age</b>                      |                       |                        |
| 16 – 19                         | 6.3%                  | 5.0%                   |
| 20 – 29                         | 28.1%                 | 30.0%                  |
| 30 – 39                         | 31.3%                 | 25.0%                  |
| 40 – 49                         | 21.9%                 | 20.0%                  |
| 50 – 59                         | 6.3%                  | 15.0%                  |
| 60 or older                     | 6.3%                  | 5.0%                   |

|                                                                  |                 |               |
|------------------------------------------------------------------|-----------------|---------------|
| <b>Gender</b>                                                    |                 |               |
| Male                                                             | 50%             | 55%           |
| Female                                                           | 50%             | 45%           |
| <b>'I've been in contact with mental health services for...'</b> |                 |               |
| less than one year                                               | 6.3%            | 10.0%         |
| 1 to 2 years                                                     | 6.3%            | 10.0%         |
| 2 to 4 years                                                     | 28.1%           | 35.0%         |
| 5 to 10 years                                                    | 12.5%           | 10.0%         |
| 10 to 20 years                                                   | 34.4%           | 25.0%         |
| more than 20 years                                               | 12.5%           | 10.0%         |
| <b>'Mental health services call my difficulties...'</b>          |                 |               |
| Psychosis                                                        | 44.0%           | 42.9%         |
| Schizophrenia                                                    | 40.0%           | 50.0%         |
| Bipolar disorder,<br>Schizoaffective disorder,<br>Other          | 16.0%<br>[n=10] | 7.1%<br>[n=7] |

**Table 3: Statements not included in final consensus**

| <b>A: 'What I most want help with'</b> | <b>Essential %</b> | <b>Important %</b> | <b>Do not know / Depends %</b> | <b>Unimportant %</b> | <b>Not required %</b> | <i>Stage Excluded</i> |
|----------------------------------------|--------------------|--------------------|--------------------------------|----------------------|-----------------------|-----------------------|
| 2. depression                          | 44.8               | 27.6               | 13.8                           | 3.4                  | 10.3                  | 3                     |
| 4. anger                               | 20.7               | 27.6               | 17.2                           | 17.2                 | 17.2                  | 2                     |
| 5. lack of emotional                   | 24.1               | 44.8               | 20.7                           | 0                    | 10.3                  | 3                     |

|                                                                                                         |      |      |      |      |      |   |
|---------------------------------------------------------------------------------------------------------|------|------|------|------|------|---|
| feeling                                                                                                 |      |      |      |      |      |   |
| 6. hearing something other people don't, such as a noise or voice                                       | 41.4 | 13.8 | 17.2 | 10.3 | 17.2 | 2 |
| 7. seeing things that others don't see                                                                  | 24.1 | 27.6 | 20.7 | 10.3 | 17.2 | 2 |
| 9. thinking things that others might think are unusual, such as 'I'm special' or 'there's a conspiracy' | 41.4 | 34.5 | 10.3 | 6.9  | 6.9  | 3 |
| 11. feeling tired or unmotivated                                                                        | 31.0 | 44.8 | 20.7 | 0 0  | 3.4  | 3 |
| 12. difficulty sleeping                                                                                 | 34.5 | 44.8 | 13.8 | 0    | 6.9  | 3 |
| 14. spending less time on my own                                                                        | 24.1 | 34.5 | 13.8 | 17.2 | 10.3 | 2 |
| 15. improving my relationships with others                                                              | 24.1 | 44.8 | 17.2 | 0    | 13.8 | 2 |
| 16. self-confidence or self-esteem                                                                      | 27.6 | 48.3 | 10.3 | 6.9  | 6.9  | 3 |
| 17. hurting myself                                                                                      | 27.6 | 13.8 | 20.7 | 3.4  | 34.5 | 2 |
| 18. thoughts of taking my own                                                                           | 53.6 | 14.3 | 10.7 | 3.6  | 17.9 | 2 |

|                                                                                                                                   |      |      |      |      |      |   |
|-----------------------------------------------------------------------------------------------------------------------------------|------|------|------|------|------|---|
| life                                                                                                                              |      |      |      |      |      |   |
| 19. alcohol or drug use                                                                                                           | 24.1 | 13.8 | 10.3 | 10.3 | 41.4 | 2 |
| 20. side-effects of psychiatric medication                                                                                        | 51.7 | 24.1 | 3.4  | 6.9  | 13.8 | 3 |
| <b>B: 'What I want for the long-term'</b>                                                                                         |      |      |      |      |      |   |
| 6. stop having any 'unusual psychological experiences' (such as hearing something or having 'unusual' thoughts that others don't) | 41.4 | 24.1 | 20.7 | 10.3 | 3.4  | 2 |
| 7. improve my social life and relationships with others                                                                           | 13.8 | 44.8 | 20.7 | 13.8 | 6.9  | 2 |
| 9. feel more hopeful about my future                                                                                              | 27.6 | 51.7 | 13.8 | 3.4  | 3.4  | 3 |
| 11. no longer take medication (for my mental health issues)                                                                       | 17.2 | 20.7 | 41.4 | 13.8 | 6.9  | 2 |
| 12. no longer need help from mental health services                                                                               | 17.2 | 27.6 | 44.8 | 6.9  | 3.4  | 2 |
| 13. physical                                                                                                                      | 27.6 | 44.8 | 10.3 | 6.9  | 10.3 | 3 |

|                                                                                   |      |      |      |      |      |   |
|-----------------------------------------------------------------------------------|------|------|------|------|------|---|
| health problems                                                                   |      |      |      |      |      |   |
| 14. improving my financial situation                                              | 20.7 | 34.5 | 24.1 | 10.3 | 10.3 | 2 |
| 15. improving my housing situation                                                | 17.2 | 31.0 | 20.7 | 6.9  | 24.1 | 2 |
| 16. continuing or re-starting my education                                        | 25.0 | 25.0 | 25.0 | 10.7 | 14.3 | 2 |
| 17. starting or continuing employment                                             | 21.4 | 39.3 | 25.0 | 0    | 14.3 | 2 |
| 18. physical activities, hobbies and interests                                    | 20.7 | 41.4 | 27.6 | 0    | 10.3 | 2 |
| <b>C: 'What I would prefer when I receive mental health help'</b>                 |      |      |      |      |      |   |
| 1. medication                                                                     | 39.3 | 25.0 | 17.9 | 3.6  | 14.3 | 2 |
| 2. meetings with a counsellor or therapist                                        | 64.3 | 14.3 | 14.3 | 0    | 7.1  | 3 |
| 3. time in hospital                                                               | 14.8 | 11.1 | 44.4 | 11.1 | 18.5 | 2 |
| 4. focus on my 'unusual psychological experiences' (such as hearing something, or | 40.7 | 22.2 | 25.9 | 3.7  | 7.4  | 2 |

|                                                                                                        |             |             |             |            |            |          |
|--------------------------------------------------------------------------------------------------------|-------------|-------------|-------------|------------|------------|----------|
| having 'unusual' or thoughts)                                                                          |             |             |             |            |            |          |
| 5. focus on other issues (such as depression, anxiety, or other personal problems)                     | 48.1        | 29.6        | 18.5        | 0          | 3.7        | 3        |
| 6. discuss my issues with me in medical language (using words such as 'mental illness' or 'diagnosis') | 3.7         | 25.9        | 33.3        | 22.2       | 14.8       | 2        |
| <b>7. discuss my issues with me in 'everyday' language that I use</b>                                  | <b>42.3</b> | <b>34.6</b> | <b>11.5</b> | <b>3.8</b> | <b>7.7</b> | <b>3</b> |
| 8. give me a clinical diagnosis for my psychological issues (such as 'psychosis')                      | 33.3        | 29.6        | 25.9        | 7.4        | 3.7        | 2        |
| <b>D: 'What I prefer when meeting with mental health staff'</b>                                        |             |             |             |            |            |          |
| 1. and include members of my family                                                                    | 14.8        | 37.0        | 29.6        | 11.1       | 7.4        | 2        |

|                                                                                            |      |      |      |      |      |   |
|--------------------------------------------------------------------------------------------|------|------|------|------|------|---|
| 2. in a group with other people who have similar psychological experiences or difficulties | 11.1 | 33.3 | 33.3 | 3.7  | 18.5 | 2 |
| 4. for brief appointments (half an hour or less)                                           | 7.4  | 33.3 | 40.7 | 11.1 | 7.4  | 2 |
| 5. for longer meetings (up to an hour or more)                                             | 14.8 | 48.1 | 29.6 | 3.7  | 3.7  | 2 |
| 6. frequently (for example, once a week or more)                                           | 18.5 | 25.9 | 48.1 | 0    | 7.4  | 2 |
| 7. infrequently (for example, once a month)                                                | 7.4  | 25.9 | 40.7 | 3.7  | 22.2 | 2 |
| 8. in mental health premises (where psychiatrists or psychologists are based)              | 7.7  | 23.1 | 42.3 | 11.5 | 15.4 | 2 |
| 9. in other places (such as my GP's surgery or my home)                                    | 11.1 | 25.9 | 55.6 | 3.7  | 3.7  | 2 |
| 10. over the phone or online (for example                                                  | 11.1 | 22.2 | 48.1 | 11.1 | 7.4  | 2 |



|                                                                                      |      |      |      |      |      |   |
|--------------------------------------------------------------------------------------|------|------|------|------|------|---|
| with emails)                                                                         |      |      |      |      |      |   |
| 12. offer the choice to speak to either male or female staff (when possible)         | 40.7 | 37.0 | 11.1 | 7.4  | 3.7  | 3 |
| 13. offer the choice to speak to staff from different ethnic or cultural backgrounds | 14.8 | 29.6 | 18.5 | 14.8 | 22.2 | 2 |
| 14. include people in their teams who've also had psychological difficulties         | 29.6 | 40.7 | 18.5 | 3.7  | 7.4  | 3 |
| 15. make it possible for me to meet others with similar psychological difficulties   | 14.8 | 40.7 | 25.9 | 3.7  | 14.8 | 2 |
